# Supplementary material
Source: HighWire-hosted journal article supplement (https://fg.bmj.com/content/flgastro-2022-102354)
Supplement: inline-supplementary-material-1 [file inline-supplementary-material-1.pdf]

## Young people's experience of virtual clinic (VC) consultations

## Person completing survey (please tick)

Parent/carer only  Parent/carer & young person together  Young person only 

Age of young person:        years    Gender:        Diagnosis :

Was this your first appointment/follow up with this team? First  Follow up  (tick one)How was your most recent hospital appointment conducted? Telephone call  Video call 

How many virtual consultations have you had?

| Technical Quality                                                           | Not at all | A little bit | Somewhat | Quite a bit | Very much |
|-----------------------------------------------------------------------------|------------|--------------|----------|-------------|-----------|
| I could use the technology easily                                           |            |              |          |             |           |
| I could hear/see the doctor/nurse clearly                                   |            |              |          |             |           |
| The doctor/nurse could hear/see me clearly                                  |            |              |          |             |           |
| Session Quality                                                             | Not at all | A little bit | Somewhat | Quite a bit | Very much |
| I felt comfortable talking to the doctor/nurse                              |            |              |          |             |           |
| I felt I was able to express my feelings/<br>questions/concerns effectively |            |              |          |             |           |
| The doctor/nurse cared about my concerns                                    |            |              |          |             |           |
| The consultation felt useful                                                |            |              |          |             |           |
| The outcome of the consultation was clear                                   |            |              |          |             |           |
| The session was better than a face-to-face<br>appointment                   |            |              |          |             |           |
| Privacy                                                                     | Not at all | A little bit | Somewhat | Quite a bit | Very much |
| I was able to find a quiet, private space for my<br>consultation            |            |              |          |             |           |
| I was concerned that people around me could<br>overhear my consultation     |            |              |          |             |           |
| I was able to talk to the doctor/nurse on my own<br>(young person)          |            |              |          |             |           |
| Usefulness of virtual consultation (VC)                                     | Not at all | A little bit | Somewhat | Quite a bit | Very much |
| VC improved my access to healthcare services                                |            |              |          |             |           |
| VC improved my medical care                                                 |            |              |          |             |           |
| VC saved me time traveling to a hospital                                    |            |              |          |             |           |
| VC saved me cost traveling to a hospital                                    |            |              |          |             |           |

| Satisfaction and Future Use                                                          | Not at all | A little bit | Somewhat | Quite a bit | Very much |
|--------------------------------------------------------------------------------------|------------|--------------|----------|-------------|-----------|
| I was satisfied with my virtual consultation                                         |            |              |          |             |           |
| I would be happy to have virtual appointments again in the future for my health care |            |              |          |             |           |

What do you feel are the main benefits of VC?

Is there anything that would put you off having VC rather than face to face appointments?

Is there anything that would improve you VC experience?
